# Supplementary material
Source: PubMed Central journal article supplement (PMC10089661)
Supplement: NIHMS1882836-supplement-Figure_S3.pdf [file NIHMS1882836-supplement-Figure_S3.pdf]

### HPPH Absorption and Aktlite Emission Spectrums

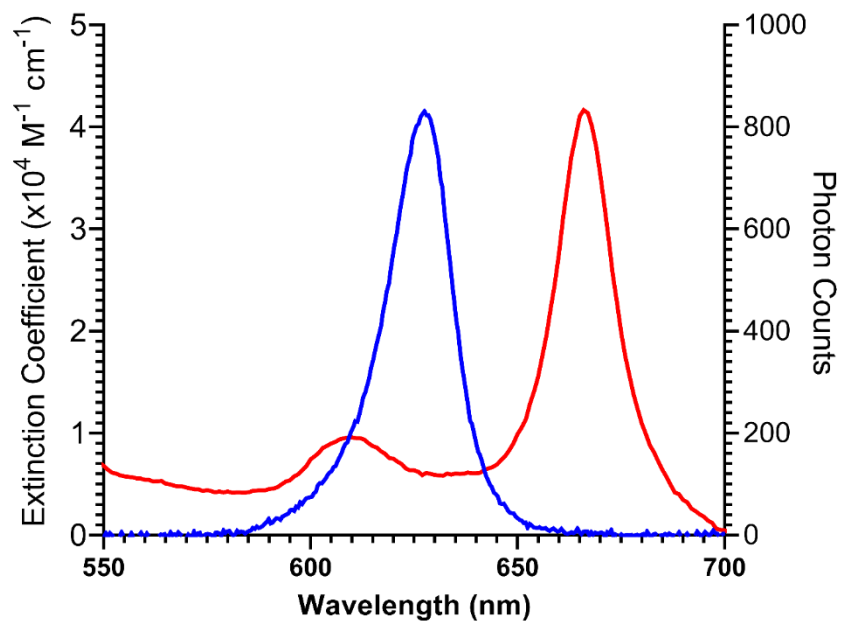

- HPPH Extinction Coefficient ( $\times 10^4 \text{ M}^{-1} \text{ cm}^{-1}$ )
- Aktlite Emission Spectrum
