# Supplementary material
Source: PubMed Central journal article supplement (PMC10089661)

**A**

# Solar Simulator

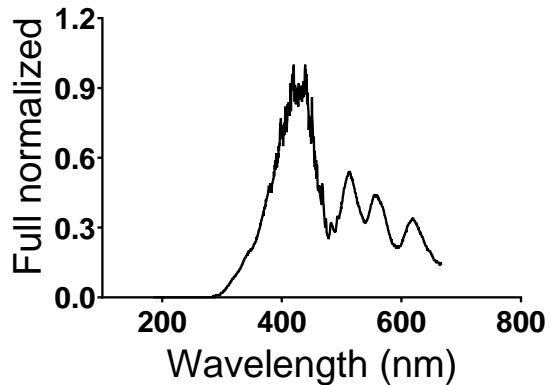**B**

# UV-A

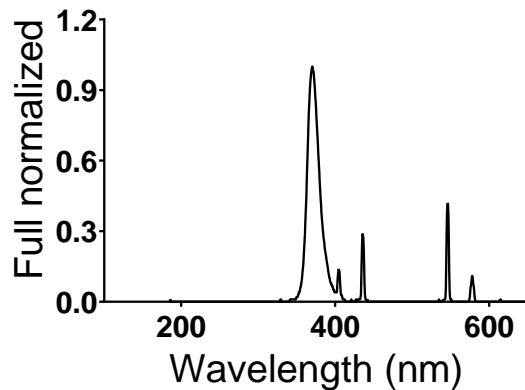**C**

# UV-B

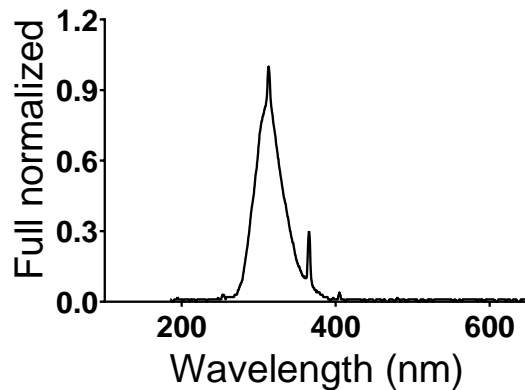

Supplement: NIHMS1882836-supplement-Figure_S1.pdf [file NIHMS1882836-supplement-Figure_S1.pdf]

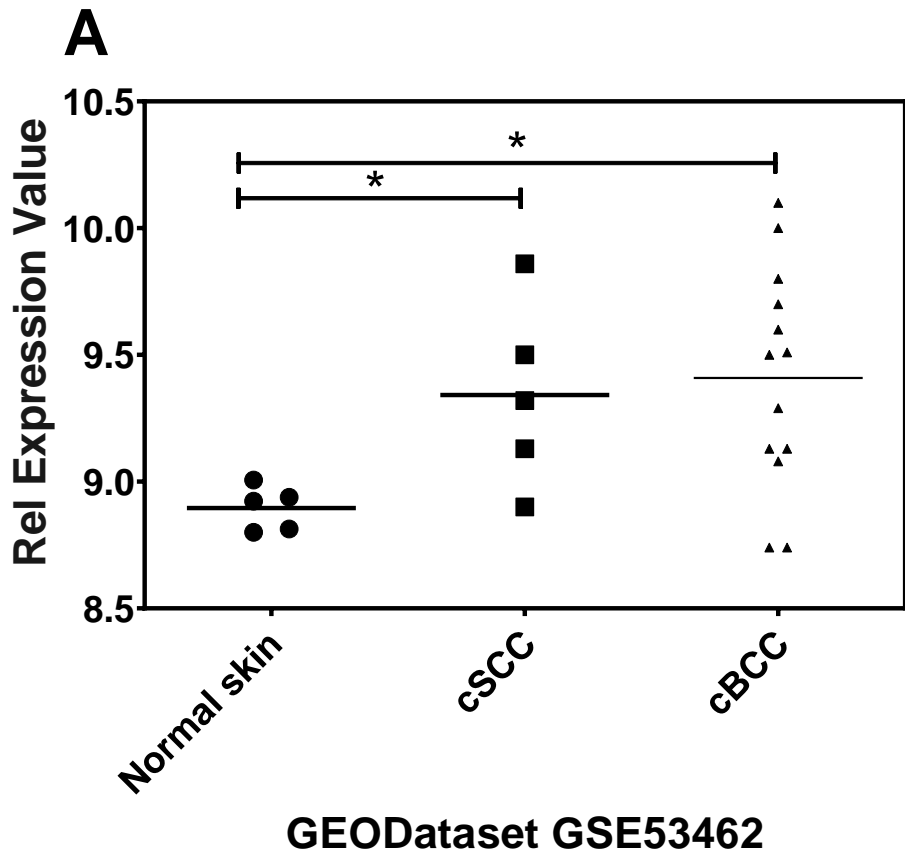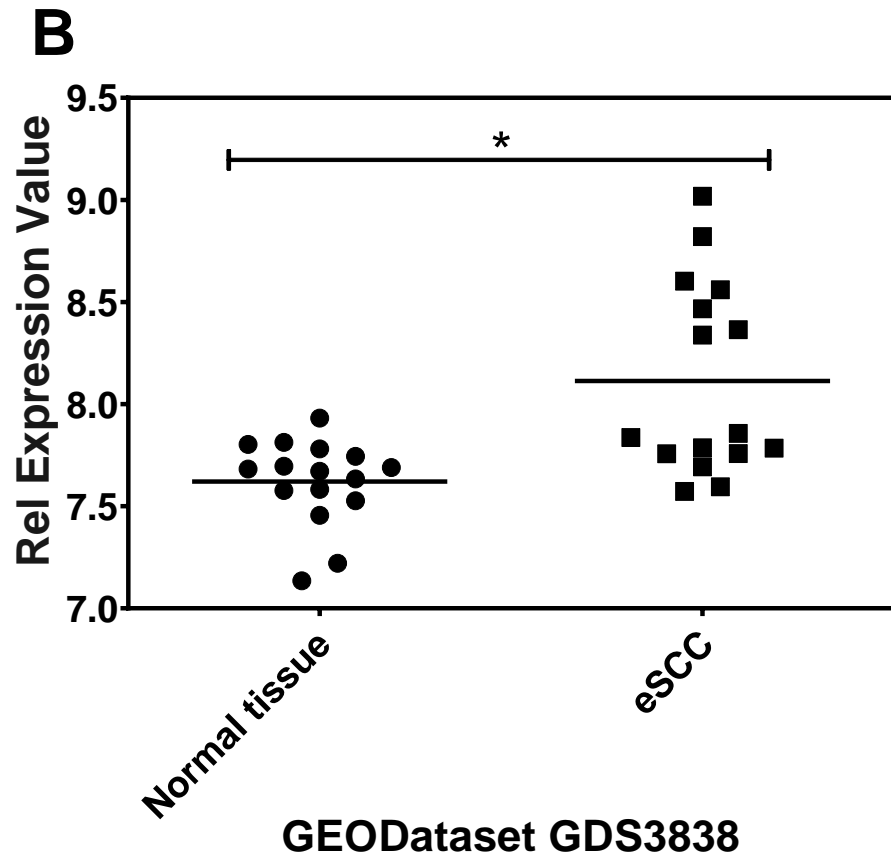

Supplement: NIHMS1882836-supplement-Figure_S2.pdf [file NIHMS1882836-supplement-Figure_S2.pdf]
